# Supplementary material
Source: Springer Nature journal article supplement (https://www.springermedizin.de/resource/supplementary/13075_2004_1362_MOESM5_ESM.pdf/9689606)

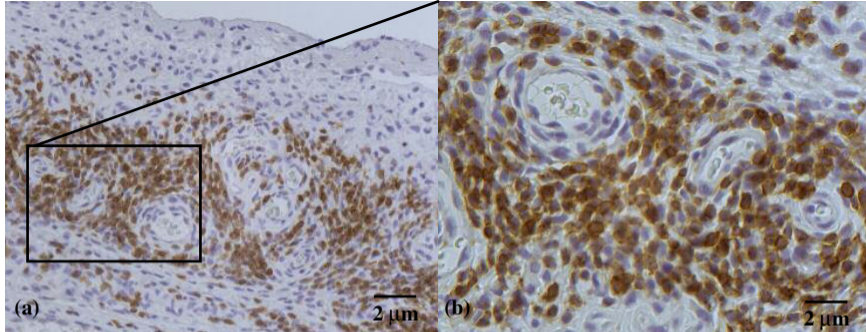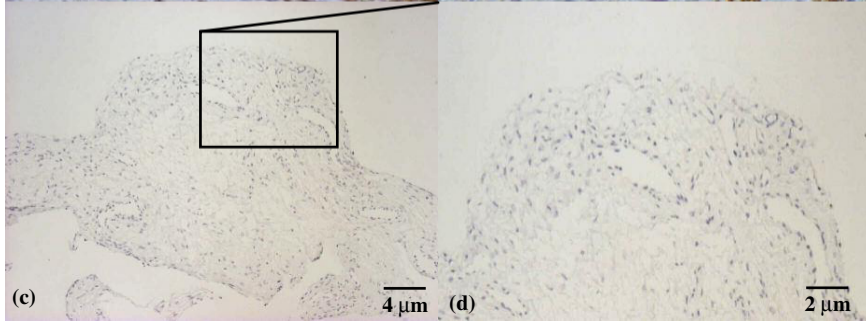

Supplement: MOESM5 [file 9689606]
